# Prevalence of Hyper- and Hypoglycemia Among Inpatients With Diabetes

A national survey of 44 U.S. hospitals

DEBORAH J. WEXLER, MD<sup>1</sup>  
JAMES B. MEIGS, MD, MPH<sup>1,2</sup>  
ENRICO CAGLIERO, MD<sup>1</sup>

DAVID M. NATHAN, MD<sup>1</sup>  
RICHARD W. GRANT, MD, MPH<sup>1,2</sup>

The recent demonstration (1–3) of the benefits of intensive glycemic control in hospitalized patients has renewed interest in inpatient management of diabetes. Poor glycemic control is a marker for poor quality of hospital care (4), as well as an important safety issue: insulin is one of five medications most associated with inpatient medication errors (5,6). Moreover, many hospitals continue to solely rely on insulin “sliding scales” despite the limitations of this approach (7,8). To gain a broader understanding of the current quality of inpatient diabetes management, we analyzed the prevalence and management of hyper- and hypoglycemia among 999 patients with known diabetes treated in 44 hospitals across the U.S.

## RESEARCH DESIGN AND METHODS

Data were derived from two sources: the University Health System Consortium (UHC) Diabetes Benchmarking Project and VHA, Inc. The UHC project collected inpatient and outpatient data in 2003 by standardized chart review of 274 patients aged  $\geq 18$  years with type 1 and type 2 diabetes (diagnosed by their outpatient physicians), who were admitted as inpatients to 1 of 29 academic medical centers located in 20 states. Chart reviewers identified the highest and lowest glucose values during hospital admissions and recorded the highest and lowest

glucose results for the 2 days preceding and following the peak and nadir.

In 2003–2004, 15 member hospitals of VHA, Inc., an alliance that serves  $\sim 1,400$  not-for-profit U.S. hospitals, performed baseline chart reviews on 725 general medical and surgical patients aged  $>18$  years with a primary or secondary discharge diagnosis of diabetes (type not specified). Data on the admission diagnosis-related group, glucose tests ( $n = 18,097$ ), and NPO status were recorded; 6 of the 15 hospitals also collected complete data on diabetes treatment ( $n = 296$ ).

For both cohorts, we determined the prevalence of extreme glucose values ( $>200$  or  $250$  mg/dl or  $<60$ ,  $50$ , or  $40$  mg/dl) and of persistent hyper- and hypoglycemia, defined as hyperglycemia  $>200$  mg/dl or hypoglycemia  $<60$  mg/dl for 3 consecutive days. We grouped insulin regimens into three categories: sliding-scale insulin alone, sliding scale with basal insulin, and basal alone. Basal insulin was defined as any long- or intermediate-acting or intravenous insulin. Because  $<5\%$  of patients were on basal insulin without sliding-scale insulin, the latter two categories were combined into a single “treatment with any basal insulin” group. The prevalence of hyper- and hypoglycemia was compared between the two treatment groups using  $\chi^2$  tests. We also stratified analyses by severity of dis-

ease using the available indicators within each cohort, defined as 1) diagnosis of type 1 diabetes, type 2 diabetes on outpatient insulin with or without oral hypoglycemic agents, or type 2 diabetes not on outpatient insulin (i.e., treated with oral hypoglycemic or diet and exercise) in the UHC cohort and 2) primary admission diagnosis code of diabetes in the VHA, Inc. cohort.

**RESULTS** — Prevalence of hyper- and hypoglycemia and treatment patterns are shown in Table 1. Hyperglycemia was common, with the majority of patients experiencing at least one value  $>250$  mg/dl. Extreme values were more common in patients with type 1 diabetes and patients with type 2 diabetes who were on insulin as outpatients in the UHC cohort, as well as among patients who were primarily admitted for diabetes in the VHA, Inc. cohort. Persistent hyperglycemia was present in 38% percent of the UHC cohort and 18% of the VHA, Inc. cohort. While hospitalized, 16% percent of patients with type 1 diabetes and 35% of patients with type 2 diabetes on insulin as outpatients were treated with sliding-scale insulin alone; 41% of patients in both cohorts with hyperglycemia  $>200$  mg/dl for 3 consecutive days were treated with sliding-scale insulin alone.

Hypoglycemia to  $<60$  mg/dl was also common, with 12% of patients in the UHC cohort and 18% in the VHA, Inc. cohort experiencing at least one episode of glucose  $<60$  mg/dl. Severe hypoglycemia ( $<40$  mg/dl) and recurrent hypoglycemia ( $<60$  mg/dl for 3 days) occurred in  $<5\%$  of patients in both cohorts. Hypoglycemia was more common in patients with more severe diabetes and in the subset of patients treated with basal insulin.

**CONCLUSIONS** — Over one-quarter of hospitalized Americans have diabetes (9). While disruptions in outpatient regimens and intercurrent illness and medication changes may cause hyper- and hypoglycemia during hospitalization, the availability of frequent monitoring, skilled nursing care, and glucose-

From the <sup>1</sup>Diabetes Unit, Massachusetts General Hospital and Harvard Medical School, Boston, Massachusetts; and the <sup>2</sup>Department of Medicine, Massachusetts General Hospital and Harvard Medical School, Boston, Massachusetts.

Address correspondence and reprint requests to Deborah Wexler, MD, Massachusetts General Hospital, Bulfinch 408, 55 Fruit Street, Boston, MA 02114. E-mail: dwexler@partners.org.

Received for publication 12 August 2006 and accepted in revised form 6 November 2006.

J.B.M. has received research grants from GlaxoSmithKline, Pfizer, and Wyeth and has served on advisory boards for GlaxoSmithKline, Merck, Pfizer, and Eli Lilly.

**Abbreviations:** UHC, University Health System Consortium.

A table elsewhere in this issue shows conventional and Système International (SI) units and conversion factors for many substances.

DOI: 10.2337/dc06-1715

© 2007 by the American Diabetes Association.

The costs of publication of this article were defrayed in part by the payment of page charges. This article must therefore be hereby marked “advertisement” in accordance with 18 U.S.C. Section 1734 solely to indicate this fact.

Table 1—Prevalence of hyperglycemia, hypoglycemia, and mode of insulin replacement in two large national samples of inpatients with diabetes

|                                                                                                       | UHC cohort, 29 hospitals |                   |                                  |                                          |          | VHA, Inc. cohort, 15 hospitals                       |                                    |                                 |          |
|-------------------------------------------------------------------------------------------------------|--------------------------|-------------------|----------------------------------|------------------------------------------|----------|------------------------------------------------------|------------------------------------|---------------------------------|----------|
|                                                                                                       | Total,<br>n = 274        | Type 1,<br>n = 37 | Type 2 on<br>insulin,<br>n = 113 | Type 2,<br>not on<br>insulin,<br>n = 124 | P        | Total,<br>n = 725                                    | Diabetes<br>primary dx,<br>n = 113 | Other<br>primary dx,<br>n = 559 | P        |
| Prevalence of hyper- and hypoglycemia                                                                 |                          |                   |                                  |                                          |          |                                                      |                                    |                                 |          |
| Prevalence of hyperglycemia (%)                                                                       |                          |                   |                                  |                                          |          |                                                      |                                    |                                 |          |
| Single value >200 mg/dl                                                                               | 77                       | 92                | 92                               | 60                                       | <0.001   | 76                                                   | 96                                 | 74                              | <0.001   |
| Single value >250 mg/dl                                                                               | 60                       | 76                | 71                               | 42                                       | <0.001   | 59                                                   | 92                                 | 54                              | <0.001   |
| Three consecutive days >200 mg/dl                                                                     | 38                       | 41                | 37                               | 19                                       | 0.003    | 18                                                   | 19                                 | 19                              | 0.9      |
| Prevalence of hypoglycemia (%)                                                                        |                          |                   |                                  |                                          |          |                                                      |                                    |                                 |          |
| Single value <60 mg/dl                                                                                | 12                       | 27                | 15                               | 5                                        | <0.001   | 18                                                   | 28                                 | 15                              | 0.008    |
| Single value <50 mg/dl                                                                                | 7                        | 22                | 7                                | 2                                        | <0.001   | 10                                                   | 15                                 | 9                               | 0.03     |
| Single value <40 mg/dl                                                                                | 3                        | 11                | 1                                | 2                                        | 0.002    | 5                                                    | 7                                  | 4                               | 0.2      |
| Three consecutive days <60 mg/dl                                                                      | 3                        | 8                 | 4                                | 0                                        | 0.02     | 5                                                    | 3                                  | 6                               | 0.1      |
| Mode of insulin replacement                                                                           |                          |                   |                                  |                                          |          |                                                      |                                    |                                 |          |
| Treatment (%)                                                                                         |                          |                   |                                  |                                          |          | VHA, Inc. subset with treatment data,<br>6 hospitals |                                    |                                 |          |
|                                                                                                       |                          |                   |                                  |                                          |          | n = 296                                              | n = 57                             | n = 239                         |          |
| Sliding scale alone                                                                                   | 41                       | 16                | 35                               | 52                                       | 0.001    | 45                                                   | 56                                 | 42                              | 0.13     |
| Any basal insulin                                                                                     | 32                       | 70                | 43                               | 10                                       | <0.001   | 32                                                   | 37                                 | 31                              | 0.42     |
| No insulin                                                                                            | 28                       | 13                | 21                               | 37                                       | 0.002    | 23                                                   | 7                                  | 27                              | 0.001    |
| Treatment modality, patients with<br>persistent hyperglycemia<br>(glucose >200 mg/dl<br>× 3 days) (%) |                          |                   |                                  |                                          |          |                                                      |                                    |                                 |          |
| Sliding scale alone                                                                                   | 41                       |                   |                                  |                                          | 0.36*    | 41                                                   |                                    |                                 | 0.34*    |
| Any basal insulin                                                                                     | 53                       |                   |                                  |                                          | <0.0001* | 59                                                   |                                    |                                 | <0.0001* |
| No insulin                                                                                            | 6                        |                   |                                  |                                          | <0.0001* | 0                                                    |                                    |                                 | <0.0001* |
| Treatment modality, patient with glucose<br><60 mg/dl (%)                                             |                          |                   |                                  |                                          |          |                                                      |                                    |                                 |          |
| Sliding scale alone                                                                                   | 12                       |                   |                                  |                                          | 0.001*   | 46                                                   |                                    |                                 | 0.98*    |
| Any basal insulin                                                                                     | 70                       |                   |                                  |                                          | <0.0001* | 50                                                   |                                    |                                 | 0.004*   |
| NPO (nothing by mouth)                                                                                | N/A                      |                   |                                  |                                          |          | 42                                                   |                                    |                                 | 0.46*    |
| Prevalence of hypoglycemia (glucose<br><60 mg/dl) among patients on<br>basal insulin (%)              |                          |                   |                                  |                                          |          |                                                      |                                    |                                 |          |
|                                                                                                       | 26                       |                   |                                  |                                          | <0.0001* | 25                                                   |                                    |                                 | 0.004*   |

Data are percentages. The total number in each cohort is given, followed by the number in each group stratified by severity of diabetes, using available data in each cohort. UHC is stratified into patients with type 1, type 2 on insulin with or without oral hypoglycemics, and type 2 on oral or diet therapy (not on insulin, based on outpatient regimen); VHA, Inc. is stratified into those with and without a primary admission diagnosis code of diabetes by DRG. \*P values are for comparisons between the patients receiving and patients not receiving the specified treatment. Data are shown for patients receiving treatment. Prevalence of hyperglycemia and hypoglycemia was greater in patients treated with basal insulin. dx, diagnosis; N/A, not available.

lowering medications should limit hyper- and hypoglycemia in the hospital setting. Our survey of a broad cross section of 44 academic and community hospitals revealed that among 999 inpatients with diabetes, marked, persistent hyperglycemia was very common and often treated by sliding-scale regimens alone, while severe hypoglycemia was rare.

Hyperglycemia is associated with increased mortality (10,11); improved control has been proven to reduce mortality in several populations. Severe hypoglyce-

mia, a complication that partially drives undertreatment of hyperglycemia, is avoidable with appropriate management (12). Since the early 1990s, it has been known (17,18) that sliding-scale insulin protocols in the absence of a basal insulin are associated with wide glycemic variations. Consensus guidelines (4,13,14) and individual experts (15,16) suggest that optimal management of inpatient glycemia should include basal insulin with prandial insulin coverage, rather than sliding scales alone.

In our analysis of data from 2003, sliding scales were prescribed as the sole treatment in 41% of the UHC cohort and 45% of the VHA, Inc. cohort. Sliding-scale insulin alone may be transiently appropriate as a dose-finding strategy or in patients with type 2 diabetes not on outpatient insulin, but it was not appropriate in the 16% of patients with type 1 diabetes and probably not for the 35% of patients with type 2 diabetes on outpatient insulin (4,19,24). Hypoglycemia <60 mg/dl was more common in patients on

basal insulin, but only one-quarter of patients on basal insulin experienced hypoglycemia.

It is noteworthy that hyperglycemia on 3 consecutive days was prevalent in both cohorts but was not treated with basal insulin in 50% of UHC patients and 40% of VHA, Inc. patients. Confounding by indication and underdosing may explain persistent hyperglycemia in patients who were treated with basal insulin. Persistent hyperglycemia or hypoglycemia may have been underestimated in the UHC cohort, since data were only collected for 2 days before and after the most extreme value.

This analysis of 44 U.S. hospitals reveals persistent shortcomings in inpatient diabetes management. Inpatient diabetes care delivery may require systematic changes in order to meet current standards.

**Acknowledgments**—J.B.M. is supported by an American Diabetes Association Career Development Award. R.W.G. is supported by a National Institute of Diabetes and Digestive and Kidney Diseases Career Development Award (K23 DK067452). D.M.N. is supported in part by the Ida S. Charlton Charity Fund.

## References

- van den Berghe G, Wouters P, Weekers F, Verwaest C, Bruyninckx F, Schetz M, Vlasselaers D, Ferdinande P, Lauwers P, Bouillon R: Intensive insulin therapy in the critically ill patients. *N Engl J Med* 345: 1359–1367, 2001
- Furnary AP, Gao G, Grunkemeier GL, Wu Y, Zerr KJ, Bookin SO, Floten HS, Starr A: Continuous insulin infusion reduces mortality in patients with diabetes undergoing coronary artery bypass grafting. *J Thorac Cardiovasc Surg* 125:1007–1021, 2003
- Malmberg K: Prospective randomised study of intensive insulin treatment on long term survival after acute myocardial infarction in patients with diabetes mellitus: DIGAMI (Diabetes Mellitus, Insulin Glucose Infusion in Acute Myocardial Infarction) Study Group. *BMJ* 314:1512–1515, 1997
- The ACE/ADA Task Force on Inpatient Diabetes: American College of Endocrinology and American Diabetes Association consensus statement on inpatient diabetes and glycemic control: a call to action. *Diabetes Care* 29:1955–1962, 2006
- Winterstein AG, Hatton RC, Gonzalez-Rothi R, Johns TE, Segal R: Identifying clinically significant preventable adverse drug events through a hospital's database of adverse drug reaction reports. *Am J Health Syst Pharm* 59:1742–1749, 2002
- Cohen MR, Proulx SM, Crawford SY: Survey of hospital systems and common serious medication errors. *J Healthc Risk Manag* 18:16–27, 1998
- Schnipper JL, Barsky EE, Shaykevich S, Fitzmaurice G, Pendergrass ML: Inpatient management of diabetes and hyperglycemia among general medicine patients at a large teaching hospital. *J Hosp Med* 1:145–150, 2006
- Baldwin D, Villanueva G, McNutt R, Bhatnagar S: Eliminating inpatient sliding-scale insulin: a reeducation project with medical house staff. *Diabetes Care* 28: 1008–1011, 2005
- Levetan CS, Passaro M, Jablonski K, Kass M, Ratner RE: Unrecognized diabetes among hospitalized patients. *Diabetes Care* 21:246–249, 1998
- Krinsley JS: Association between hyperglycemia and increased hospital mortality in a heterogeneous population of critically ill patients. *Mayo Clin Proc* 78:1471–1478, 2003
- Malmberg K, Norhammar A, Wedel H, Ryden L: Glycometabolic state at admission: important risk marker of mortality in conventionally treated patients with diabetes mellitus and acute myocardial infarction: long-term results from the Diabetes and Insulin-Glucose Infusion in Acute Myocardial Infarction (DIGAMI) study. *Circulation* 99:2626–2632, 1999
- Braithwaite SS, Buie MM, Thompson CL, Baldwin DF, Oertel MD, Robertson BA, Mehrotra HP: Hospital hypoglycemia: not only treatment but also prevention. *Endocr Pract* 10 (Suppl. 2):89–99, 2004
- Garber AJ, Moghissi ES, Bransome ED Jr, Clark NG, Clement S, Cobin RH, Furnary AP, Hirsch IB, Levy P, Roberts R, Van den Berghe G, Zamudio V: American College of Endocrinology position statement on inpatient diabetes and metabolic control. *Endocr Pract* 10 (Suppl. 2):4–9, 2004
- Clement S, Braithwaite SS, Magee MF, Ahmann A, Smith EP, Schafer RG, Hirsch IB: Management of diabetes and hyperglycemia in hospitals. *Diabetes Care* 27: 553–591, 2004
- Moghissi ES, Hirsch IB: Hospital management of diabetes. *Endocrinol Metab Clin North Am* 34:99–116, 2005
- Metchick LN, Petit WA Jr, Inzucchi SE: Inpatient management of diabetes mellitus. *Am J Med* 113:317–323, 2002
- Gearhart JG, Duncan JL 3rd, Replogle WH, Forbes RC, Walley EJ: Efficacy of sliding-scale insulin therapy: a comparison with prospective regimens. *Fam Pract Res J* 14:313–322, 1994
- Queale WS, Seidler AJ, Brancati FL: Glycemic control and sliding scale insulin use in medical inpatients with diabetes mellitus. *Arch Intern Med* 157:545–552, 1997
- Umpierrez GE, Maynard G: Glycemic chaos (not glycemic control) still the rule for inpatient care: how do we stop the insanity? *J Hosp Med* 1:141–144, 2006
- Levetan CS, Salas JR, Wilets IF, Zumoff B: Impact of endocrine and diabetes team consultation on hospital length of stay for patients with diabetes. *Am J Med* 99:22–28, 1995
- Koproski J, Pretto Z, Poretsky L: Effects of an intervention by a diabetes team in hospitalized patients with diabetes. *Diabetes Care* 20:1553–1555, 1997
- Knecht LAD, Gauthier SM, Castro JC, Schmidt RE, Whitaker MD, Zimmerman RS, Mishark KJ, Cook CB: Diabetes care in the hospital: is there clinical inertia? *J Hosp Med* 1:151–160, 2006
- Grant RW, Cagliero E, Dubey AK, Gildesgame C, Chueh HC, Barry MJ, Singer DE, Nathan DM, Meigs JB: Clinical inertia in the management of type 2 diabetes metabolic risk factors. *Diabet Med* 21:150–155, 2004
- Inzucchi SE: Management of hyperglycemia in the inpatient setting. *NEJM* 355: 1903–1911, 2006
